# Supplementary material
Source: publisher site journal article supplement (https://www.dovepress.com/article/375569)
Supplement: Supplementary file 1 [file get_supplementary_file.php]

|  | **Preoperative values** | | **Postoperative values** | |  |
| --- | --- | --- | --- | --- | --- |
| **Parameter** | **n** | **Mean ± SD** | **n** | **Mean ± SD** | **p** |
| UDVA (logMAR) | 37 | 1.11 ± 0.38 | 37 | 0.43 ± 0.27 | <0.0001 |
| CDVA (logMAR) | 37 | 0.65 ± 0.15 | 37 | 0.21 ± 0.18 | <0.0001 |
| Sph (D) | 31 | *-4.0 (-7.0 : -1.38) | 32 | 0.84 ± 2.6 | <0.0001 |
| Cyl (D) | 31 | *-3.75 (-7.0 : -2.25) | 32 | *-2.12 (-3.75 : -0.19) | 0.0014 |
| SE (D) | 31 | -7.01 ± 5.08 | 32 | -0.36 ± 2.53 | <0.0001 |
| K1 preop (D) | 37 | 49.22 ± 4.35 | 35 | 42.59 ± 2.75 | <0.0001 |
| K2 preop (D) | 37 | *52.17 (50.08 : 56.1) | 35 | 46.88 ± 3.11 | <0.0001 |
| meanK (D) | 37 | *50.0 (48.49 : 53.25) | 35 | 44.74 ± 2.65 | <0.0001 |
| topoAsti (D) | 37 | 4.43 ± 2.94 | 35 | *4.0 (2.18 : 5.66) | 0.4351 |
| **Kmax preop (D) | 37 | *59.2 (55.87 : 63.3) | 36 | 56.35 ± 7.0 | 0.0071 |
| min. Pachy (µm) | 37 | 424.92 ± 33.64 | 36 | 432.67 ± 39.41 | 0.3755 |

## Appendix A: Upper Quintile of preoperative CDVA: Descriptive statistics

* Denotes variables that are not normally distributed as median (interquartile range)
**Preoperative and postoperative values for Kmax could be located at completely different points in the cornea.
Abbreviations**:** SD: Standard Deviation; Sph: refractive sphere; Cyl: refractive cylinder; SE: spherical equivalent; K1: Flat meridian of anterior simulated keratometry, K2: Steep meridian of anterior simulated keratometry min. Pachy: thinnest pachymetry reading; Kmax: maximum keratometry reading; topo Asti: topographical astigmatism

Appendix B- Posthoc Correlational Analysis with Achieved CDVA Potential

| **Preoperative Parameter** | **Achieved CDVA Potential  Correlation Coefficient** | **p** |
| --- | --- | --- |
| Age (year) | 0.07 | 0.4313 |
| UDVA (logMAR) | -0.08 | 0.4061 |
| CDVA (logMAR) | 0.14 | 0.1364 |
| Sph (D) | -0.09 | 0.3338 |
| Cyl (D) | 0.01 | 0.9019 |
| SE (D) | -0.09 | 0.3618 |
| K1 preop (D) | -0.06 | 0.551 |
| K2 preop (D) | -0.03 | 0.7114 |
| meanK (D) | -0.06 | 0.4877 |
| topoAsti (D) | 0.1 | 0.2596 |
| Kmax preop (D) | 0.05 | 0.5937 |
| min. Pachy (µm) | -0.13 | 0.1771 |

Table 4 displays how preoperative parameters correlate with the postoperative gains in UDVA and CDVA lines. The correlation coefficient denotes the Spearman rank coefficient ρ.

A Bernoulli-adjusted alpha’ would yield significant correlations for p-values equal or below:0.0042

Abbreviations**:** Sph: refractive sphere; Cyl: refractive cylinder; SE: spherical equivalent; K1: Flat meridian of anterior simulated keratometry, K2: Steep meridian of anterior simulated keratometry min. Pachy: thinnest pachymetry reading; Kmax: maximum keratometry reading; topo Asti: topographical astigmatism
